# Supplementary material for: Antarctic Basal Water Storage Variation Inferred from Multi-Source Satellite Observation and Relevant Models
Source: MDPI journal article supplement (doi:10.3390/rs14102337), 2022-05-12
Supplement: s1 [file s1]

Archive with 1 entries (1 files):
- remotesensing-1683245-supplementary.pdf
